# Supplementary material
Source: publisher figshare collection journal article supplement (https://gsajournals.figshare.com/articles/dataset/_/12579737)
Supplement: Supplementary file 1 [file 3]

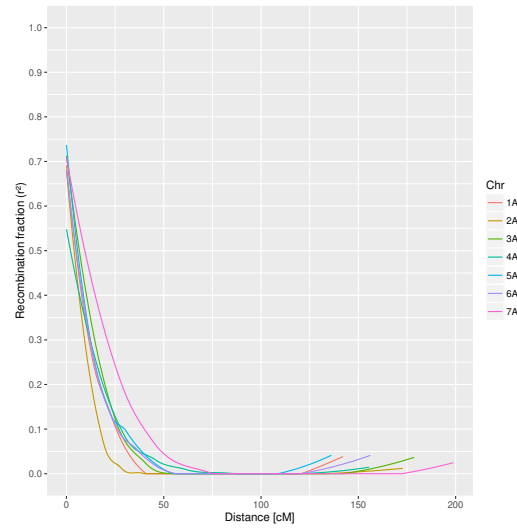

(a)

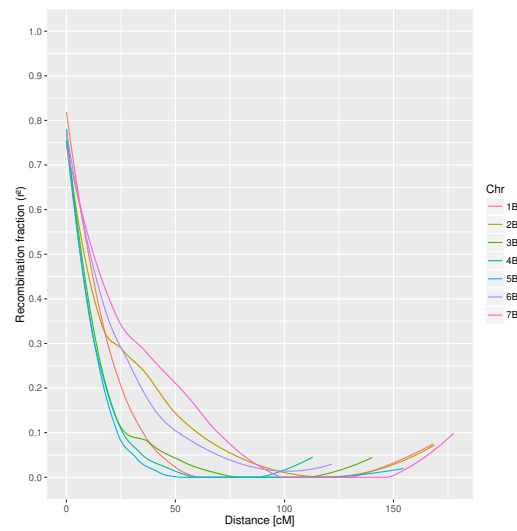

(b)

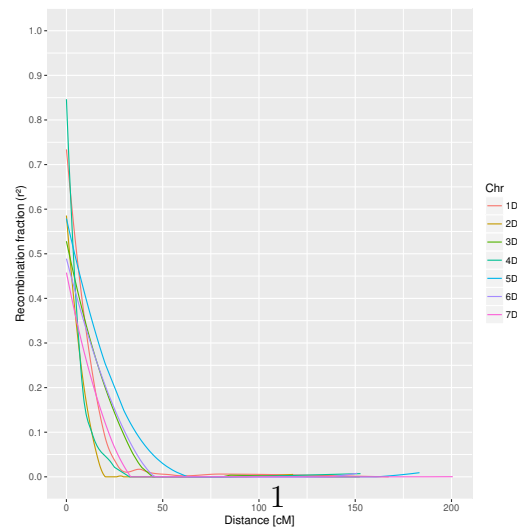

(c)

**Supplementary Figure 1** LD decay plot for the individual chromosomes of the three sub genomes A (a), B (b) and D (c) of the B22 population.

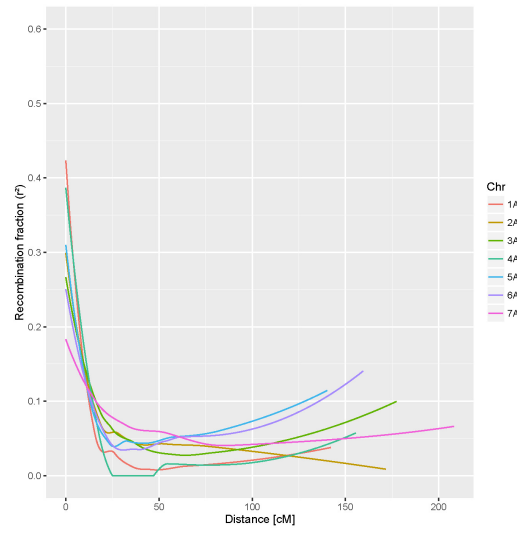

(a)

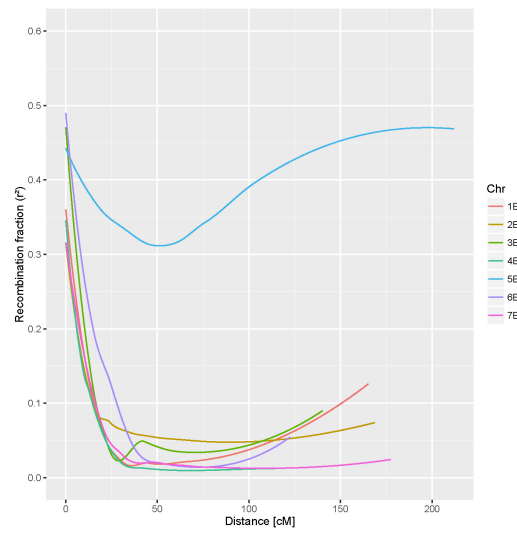

(b)

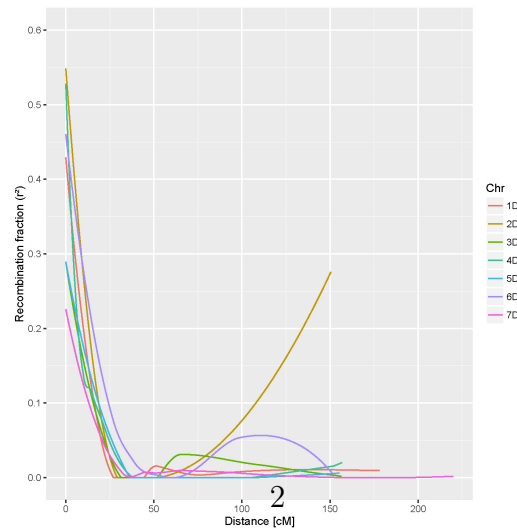

(c)

**Supplementary Figure 2** LD decay plot for the individual chromosomes of the three sub genomes A (a), B (b) and D (c) of the Z86 population.

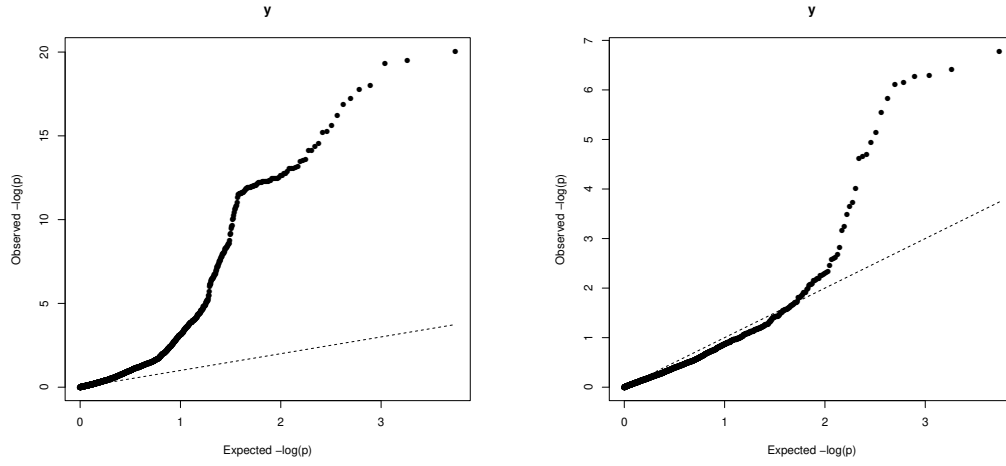

**Supplementary Figure 3** Q-Q plots based on the single-locus model without the polygenic effect (a) and with the polygenic effect in the model (b) using the Simulation 1 data set.

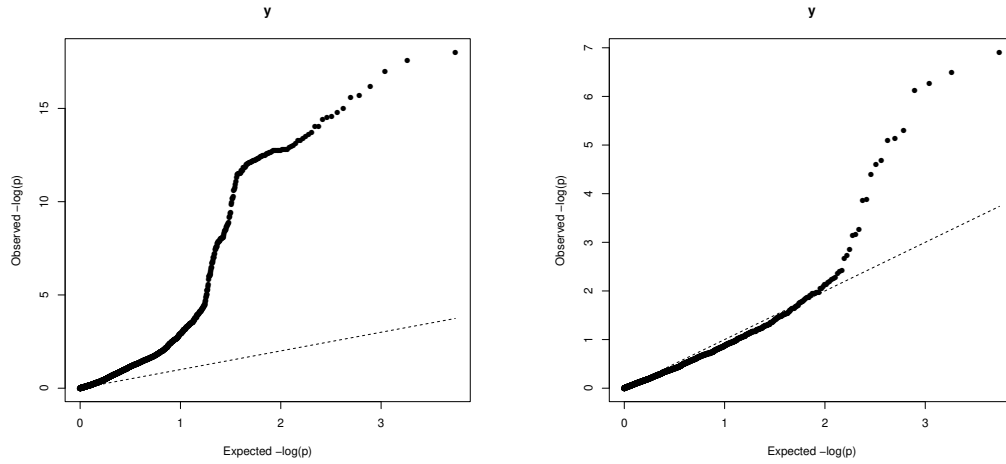

**Supplementary Figure 4** Q-Q plots based on the single-locus model without the polygenic effect (a) and with the polygenic effect in the model (b) using the Simulation 2 data set.

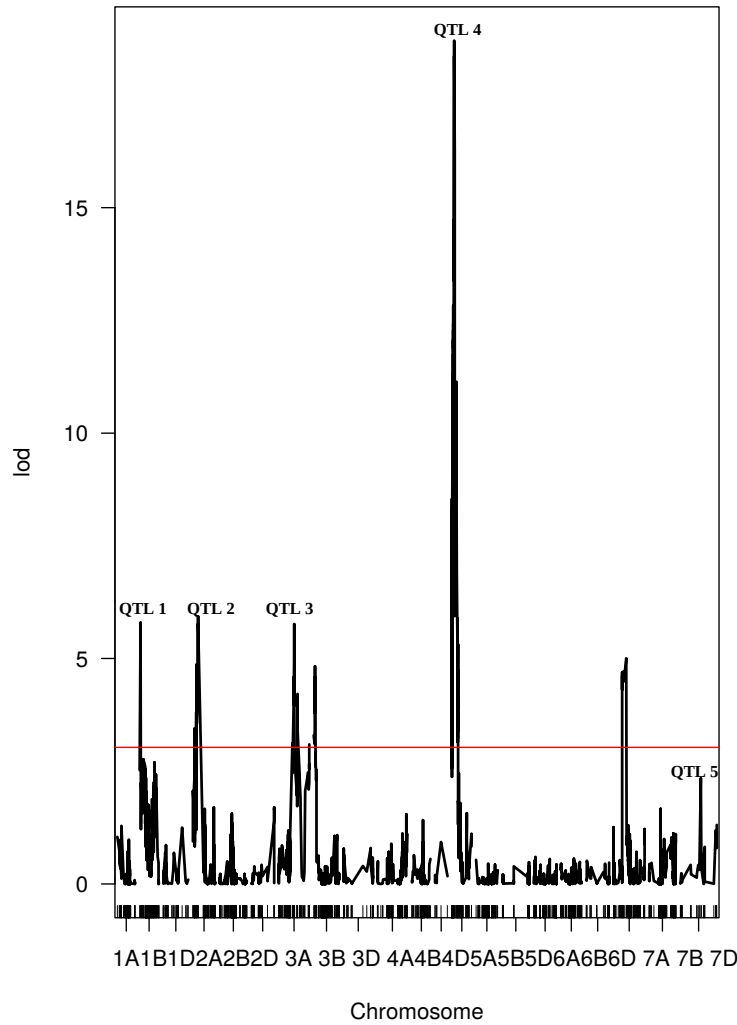

**Supplementary Figure 5** LOD scores based on the interval mapping approach using the simulated data without the polygenic effect (Simulation 1). The red line show a LOD threshold for the significant QTL determined with  $r/qtl$  using 1000 permutations at  $p = 0.05$ . Additionally, the simulated QTLs are also shown.
